# Supplementary material
Source: Springer Nature journal article supplement (https://www.springermedizin.de/resource/supplementary/12990_2008_191_MOESM3_ESM.pdf/9612906)

# Naive MD

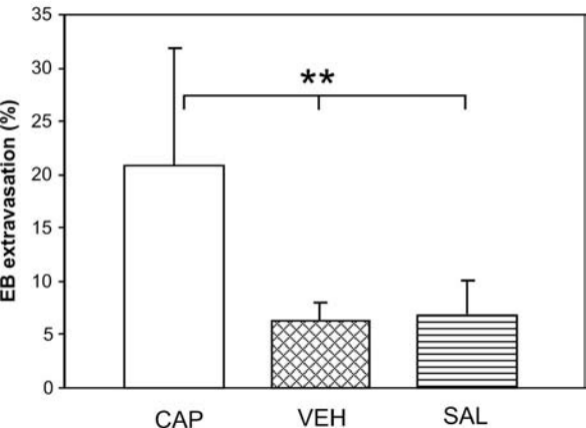

Supplement: MOESM3 [file 9612906]
